# Supplementary material
Source: PubMed Central journal article supplement (PMC6879786)
Supplement: NIHMS1045712-supplement-1.pdf [file NIHMS1045712-supplement-1.pdf]

1 Supplementary Methods:

2 • Definition of areflexia and total reflex score:

3 The following limb reflex items used to define reflex-related measures were scored as  
4 observed in the neurological examination: Bicep, tricep, brachioradialis, patella, and  
5 ankle, scored separately for the left and right side as Absent = 0, Decreased (trace or only  
6 with reinforcement) = 1, Normal = 2, Increased (brisk) = 3, or Hyperreflexic (clonus) = 4.  
7 If all 10 items were scored = 0, then areflexia was considered present; if each of the 10  
8 items was assigned an integer-valued code 1-4, then areflexia was considered absent;  
9 otherwise, areflexia was considered missing, i.e. neither present nor absent. Finally, if  
10 each of the 10 items was assigned an integer-valued code 0-4, then the codes were  
11 summed to calculate a total reflex score with possible range 0 to 40; if any item among  
12 the 10 did not have an integer-valued code 0-4, then the total reflex score was coded as  
13 missing for the subject.

14 • Definition of Rostrocaudal Gradient, Face > Arm > Leg:

15 The following rating scale was used to code severity of separate symptoms, as observed  
16 by IH as part of the neurological examination, for the subject's mouth,  
17 speech/swallowing, left arm, right arm, left leg, and right leg: No dystonia = 0, Slight =  
18 1, Mild = 2, Moderate = 3, and Severe = 4. If each of the six items was assigned an  
19 integer-valued code 0-4, then the codes were summed to calculate a face score (mouth +  
20 speech/swallowing), an arm score (left + right), and a leg score (left + right); these were  
21 used, in turn, to assign presence or absence of the gradient based on a composite of strict  
22 inequalities: If (face score > arm score, and arm score > leg score) is true, then gradient =  
23 present, and if (face score > arm score, and arm score > leg score) is not true, then

24 gradient = absent. If any item among the six did not have an integer-valued code 0-4, then  
25 the gradient was coded as missing for the subject, i.e., neither present, nor absent.

26 • Definition of Absent, Possible/Probable, and Definite Parkinsonism:

27 The following parkinsonism rating scale (1-4) was used to code parkinsonism, as  
28 observed as part of the neurological examination: Unaffected/no parkinsonism = 1,  
29 possible parkinsonism = 2, probable parkinsonism = 3, and definite parkinsonism = 4. If  
30 the parkinsonism rating scale was unscored, then parkinsonism was coded as missing.

31 • Definition of Diagnostic History of Dystonia, and Dystonia on Examination:

32 All subjects or other informants were asked whether the subject had ever been diagnosed  
33 with a movement disorder, and, if they had, then they were asked what was the diagnosis  
34 or diagnoses. If the response contained "rapid-onset dystonia-parkinsonism," "RDP,"  
35 "dystonia," or "dysphonia" then the subject was considered history-positive for a  
36 diagnosis of dystonia. The Burke-Fahn-Marsden Dystonia Rating Scale was used to  
37 define the presence of dystonia on examination (BFMDRS>0).

38 • Definition of Area Most Severely affected:

39 Severity was determined with reference to the severity subscores for each body region in  
40 the BFMDRS. Each subjectively symptomatic carrier was considered separately, and all  
41 areas yielding the highest severity score for that individual were considered 'areas most  
42 severely affected' This was then totaled across all carriers. Percentages per area were  
43 derived from the ratio of total number of carriers indicating that area as a 'most affected'  
44 to the total number of carriers.

45 • Definition of dystonia distribution:

46 Each patient with dystonia was assigned to either ‘generalized’, ‘multifocal’, ‘segmental’,  
47 or focal on the basis of their ‘provoking factor’ Burke-Fahn-Marsden Dystonia Rating  
48 Scale provoking factor subscale scores. Provoking factors are graded as: 0 - No dystonia  
49 at rest or with action; 1 - Dystonia only with particular action; 2 - Dystonia with many  
50 actions; 3 - Dystonia on action of distant part of body or intermittently at rest; 4 -  
51 Dystonia present at rest. Subjects were assigned categories on the following bases:  
52 generalized – trunk involved along with two other regions; multifocal – more than one  
53 noncontiguous region involved; segmental – multiple areas involved but all contiguous;  
54 focal – only a single region involved.

55 • Definition of Bulbar Symptoms:

56 Eight items were used to code bulbar symptoms, as observed as part of the neurological  
57 examination. The first three items were related to speech: dysarthric, breathy, and voice  
58 breaks. Each of these was coded as: Yes = 1, No = 2, and Not testable = 3. The next  
59 three items were related to cranial nerves: palate, shoulder shrug, and tongue. Each of  
60 these was coded as: Normal = 1, Abnormal = 2, and Not testable = 3. The last two items  
61 were dystonia in the mouth region, and speech/swallowing difficulty, which are  
62 Provoking Factor items from the Burke-Fahn-Marsden Dystonia Rating Scale observed  
63 on the subjects. The mouth item was coded as: No dystonia at rest or with action = 0,  
64 Dystonia only with particular action = 1, Dystonia with many actions = 2, Dystonia on  
65 action of distant part of body or intermittently at rest = 3, and Dystonia present at rest =  
66 4. Speech/swallowing was coded as: No difficulty with either = 0, Occasional either or  
67 both = 1, Frequent either = 2, Frequent one and occasional other = 3, Frequent both = 4.  
68 Bulbar symptoms were considered present if one or more of the eight was scored

69 affirmatively (even if one or more than one was unscored): dysarthric speech, breathy, or  
70 voice breaks = 1; palate, shoulder shrug, or tongue = 2; or mouth or speech/swallowing 1-  
71 4. Bulbar symptoms were considered absent if all of the eight items were scored in the  
72 negative: dysarthric speech, breathy, and voice breaks = 2; palate, shoulder shrug, and  
73 tongue = 1; and mouth and speech/swallowing = 0. Otherwise, if all of the items were  
74 either negative, not testable, or unscored, then bulbar symptom status was considered  
75 missing, i.e., neither present, nor absent.

76 • Definition of Cerebellar Dysfunction:

77 The following items and rating scales from the International Cooperative Ataxia Rating  
78 Scale (ICARS) were used to define cerebellar dysfunction, as observed by IH as part of  
79 the neurological examination: Knee-tibia test (decomposition of movement and intention  
80 tremor) scored separately for the left and right side as Normal = 0, Lowering of heel in  
81 continuous axis, but the movement is decomposed in several phases, without real jerks, or  
82 abnormally slow = 1, Lowering jerkily in the axis = 2, Lowering jerkily with lateral  
83 movements = 3, and Lowering jerkily with extremely strong lateral movements or test  
84 impossible = 4; finger-to-nose test (decomposition and dysmetria) scored separately for  
85 the left and right finger as No trouble = 0, Oscillating movement without decomposition  
86 of the movement = 1, Segmented movement in more than 2 phases and/or moderate  
87 dysmetria in reaching nose = 2, Segmented movement in more than 2 phases and/or  
88 considerable dysmetria in reaching nose = 3, and Dysmetria preventing the patient from  
89 reaching nose = 4; gaze-evoked nystagmus, scored as Normal = 0, Transient = 1,  
90 Persistent but moderate = 2, and Persistent and severe = 3; and Dysmetria of the saccade,  
91 scored as Absent = 0, and Bilateral clear overshoot or undershoot of the saccade = 1. If

92 at least one of the six items was scored  $> 0$ , then cerebellar dysfunction was considered  
93 present (even if one or more than one was unscored). If all six were scored = 0, then  
94 cerebellar dysfunction was considered absent. Otherwise, if all of the items were either =  
95 0 or unscored, then cerebellar dysfunction status was considered missing, i.e., neither  
96 present, nor absent.

- 97 • Methodology for Figure 2: ‘region where first symptom was felt’ was gathered from the  
98 patient questionnaire, which allowed ‘face’, ‘mouth’, ‘arm’, or ‘leg’. Regions involved at  
99 initial exam and dystonia score distributions were derived from subjects’ Burke Fahn  
100 Marsden Dystonia Rating Scale regional subscores for eyes and mouth (face),  
101 speech/swallowing, arms, and legs (scored 0-4, with no dystonia = 0, slight = 1, mild = 2,  
102 moderate = 3, and severe = 4). When both right and left severity scores were available for  
103 a region, the higher value was selected.

104

105

**Supplementary Table 1: Statistical analysis of key motor features in those with and without ATP1A3 mutations, with missing data**

| Characteristics        |                      | Carriers<br>N=44 | Noncarriers<br>N=44 | p-Value  |
|------------------------|----------------------|------------------|---------------------|----------|
| Rapidity of onset      | Rapid onset          | 35 (79.5%)       | 0 (0.0%)            | 0.014    |
|                        | Non-rapid onset      | 9 (20.5%)        | 3 (6.8%)            |          |
|                        | No onset             | 0 (0.0%)         | 41 (93.2%)          |          |
|                        | Missing data         | 0 (0.0%)         | 0 (0.0%)            |          |
| F > A > L Gradient     | Yes                  | 3 (7.0%)         | 0 (0.0%)            | 0.241    |
|                        | No                   | 40 (93.0%)       | 43 (100.0%)         |          |
|                        | Missing data         | 1 (2.3%)         | 1 (2.3%)            |          |
| Bulbar Symptoms        | Yes                  | 41 (95.3%)       | 2 (5.0%)            | < 0.001  |
|                        | No                   | 2 (4.7%)         | 38 (95.0%)          |          |
|                        | Missing data         | 1 (2.3%)         | 4 (9.1%)            |          |
| Headaches              | Yes                  | 26 (68.4%)       | 17 (39.5%)          | 0.031    |
|                        | No                   | 12 (31.6%)       | 26 (60.5%)          |          |
|                        | Missing data         | 6 (13.6%)        | 1 (2.3%)            |          |
| Seizures               | Yes                  | 12 (30.8%)       | 3 (7.1%)            | 0.001    |
|                        | No                   | 27 (69.2%)       | 38 (90.5%)          |          |
|                        | I don't know         | 0 (0.0%)         | 1 (2.4%)            |          |
|                        | Missing data         | 5 (10%)          | 2 (4.6%)            |          |
| Parkinsonism           | Absent               | 1 (2.3%)         | 40 (97.6%)          | < 0.0001 |
|                        | Possible/Probable    | 9 (20.9%)        | 1 (2.4%)            |          |
|                        | Definite             | 33 (76.7%)       | 0 (0%)              |          |
|                        | Missing data         | 1 (2.3%)         | 3 (6.8%)            |          |
| Tremor                 | Any                  | 13 (29.5%)       | 6 (14.0%)           | 0.118    |
|                        | Missing data         | 0 (0.0%)         | 1 (2.3%)            |          |
|                        | Action & rest tremor | 3 (6.8%)         | 0 (0.0%)            | 0.103    |
|                        | Action only          | 10 (22.7%)       | 6 (14.0%)           |          |
|                        | Rest only            | 0 (0.0%)         | 0 (0.0%)            | 0.118    |
|                        | Missing data         | 0 (0.0%)         | 0 (0.0%)            |          |
| None                   | 31 (70.5%)           | 37 (86.0%)       |                     |          |
| BFMDRS                 |                      | 53.2 (29.4)      | 0.2 (0.6)           | < 0.001  |
|                        | Missing data         | 1                | 1                   |          |
| UPDRS                  |                      | 42.6 (18.6)      | 4.5 (0.6)           | 0.002    |
|                        | Missing data         | 35               | 40                  |          |
| Cerebellar Dysfunction | Yes                  | 7 (70.0%)        | 0 (0.0%)            | 0.070    |
|                        | No                   | 3 (30.0%)        | 4 (100.0%)          |          |
|                        | Missing data         | 34 (77.3%)       | 40 (90.9%)          |          |

|          |              |            |            |        |
|----------|--------------|------------|------------|--------|
|          |              | 22.7 (7.0) | 18.8 (4.0) | 0.004* |
| Reflexes | Missing data | 7 (14.0%)  | 5 (10.0%)  |        |

108

109 Statistical analysis of key motor features in those with and without *ATP1A3* mutations. Percentages are given with  
 110 respect to total assessed subjects; where there are missing data due to patient-specific issues, information is given in  
 111 supplementary data. Standard deviations are given in parentheses (SD) where appropriate. BMFDRS = Burke Fahn  
 112 Marsden Dystonia Rating Scale, UPDRS = Unified Parkinson's Disease Rating Scale motor subscale, Y-BOCS =  
 113 Yale Brown Obsessive Compulsive Symptom Scale. \* reflex scores are given as a sum of limb reflex scores (bilateral  
 114 biceps, triceps, brachioradialis, patellar, Achilles' tendons with each scored 0-4, total range 0-40). Further detail on  
 115 calculation methodology is given in Supplemental Methods above.

116

117

118

119 **Supplementary Table 2: Statistical analysis of key nonmotor features in those with and without**  
 120 **ATP1A3 mutations, with missing data**  
 121

| Characteristics      |                       | Carriers<br>N=44 | Noncarriers<br>N=44 | p-Value |
|----------------------|-----------------------|------------------|---------------------|---------|
| Cognitive Function   | Trailmaking B         | 35.8 (10.3)      | 51.2 (12.0)         | < 0.001 |
|                      | Missing data          | 18               | 15                  |         |
|                      | Linguistic Fluency    | 33.9 (8.5)       | 46.9 (9.2)          | < 0.001 |
|                      | Missing data          | 24               | 16                  |         |
|                      | Semantic Fluency      | 37.1 (13.1)      | 51.4 (9.6)          | < 0.001 |
|                      | Missing data          | 23               | 15                  |         |
| Psychiatric symptoms | SCID Mood Disorder    | 16 (50%)         | 7 (22%)             | 0.036   |
|                      | Missing data          | 15               | 17                  |         |
|                      | SCID Anxiety Disorder | 13 (41%)         | 12 (38%)            | 0.080   |
|                      | Missing data          | 15               | 17                  |         |
|                      | SCID Psychosis        | 7 (22%)          | 0 (0%)              | 0.011   |
|                      | Missing data          | 15               | 17                  |         |
|                      | SCID Substance Abuse  | 11 (34%)         | 8 (26%)             | 0.590   |
|                      | Missing data          | 15               | 17                  |         |
|                      | Hamilton Anxiety      | 7.2 (7.3)        | 5.2 (8.7)           | 0.240   |
|                      | Missing data          | 16               | 15                  |         |
|                      | Hamilton Depression   | 10.5 (9.2)       | 6.3 (7.7)           | 0.051   |
|                      | Missing data          | 16               | 15                  |         |
| YBOCS                | 3.2 (6.3)             | 0.9 (3.1)        | 0.385               |         |
| Missing data         | 15                    | 16               |                     |         |

122  
 123 Statistical analysis of key nonmotor features in those with and without *ATP1A3* mutations. Mean cognitive  
 124 scores in the mutation-positive group were in the Mild Impairment range based on the tests' normative  
 125 values (Heaton *et al.*, 2004), while mutation negative patients all exhibited Average range performance  
 126 on these measures. Numeric values are counts (column percentages) and means ( $\pm$ SD). SCID =  
 127 Structured Clinical Interview for DSM-IV, Y-BOCS = Yale Brown Obsessive Compulsive Symptom Scale.  
 128

129  
 130

131
